# Supplementary material for: Synthetic studies towards the Lycopodium alkaloid paniculatine
Source: Royal Society of Chemistry journal article supplement (doi:10.1039/c3ra41467a), 2013-01-01

## **Synthetic Studies towards *Lycopodium* Alkaloid Paniculatine**

Shenghui Lei\*

*Laboratory of Molecular Engineering, and Laboratory of Natural Products Synthesis,  
Guangzhou Institutes of Biomedicine and Health, Chinese Academy of Sciences,  
190 Kaiyuan Avenue, Guangzhou 510530, China*

lei\_shenghui@gibh.ac.cn

### **Supplementary Data**

#### **Copies of $^1\text{H}$ and $^{13}\text{C}$ NMR Spectra**

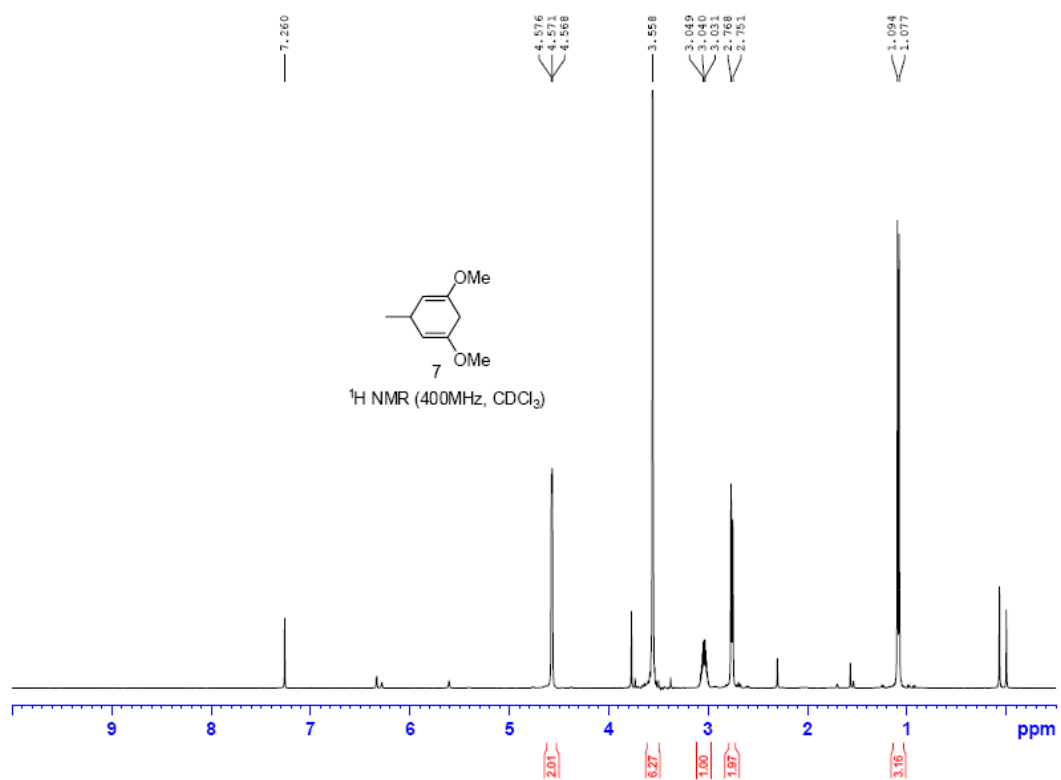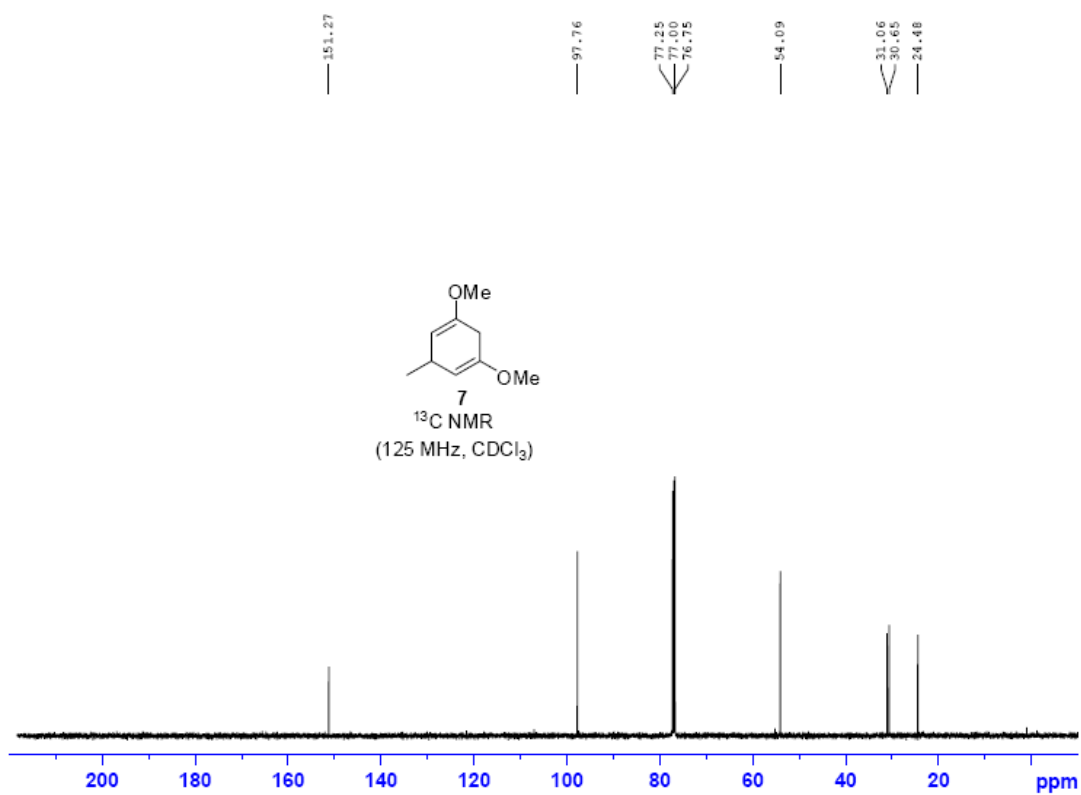

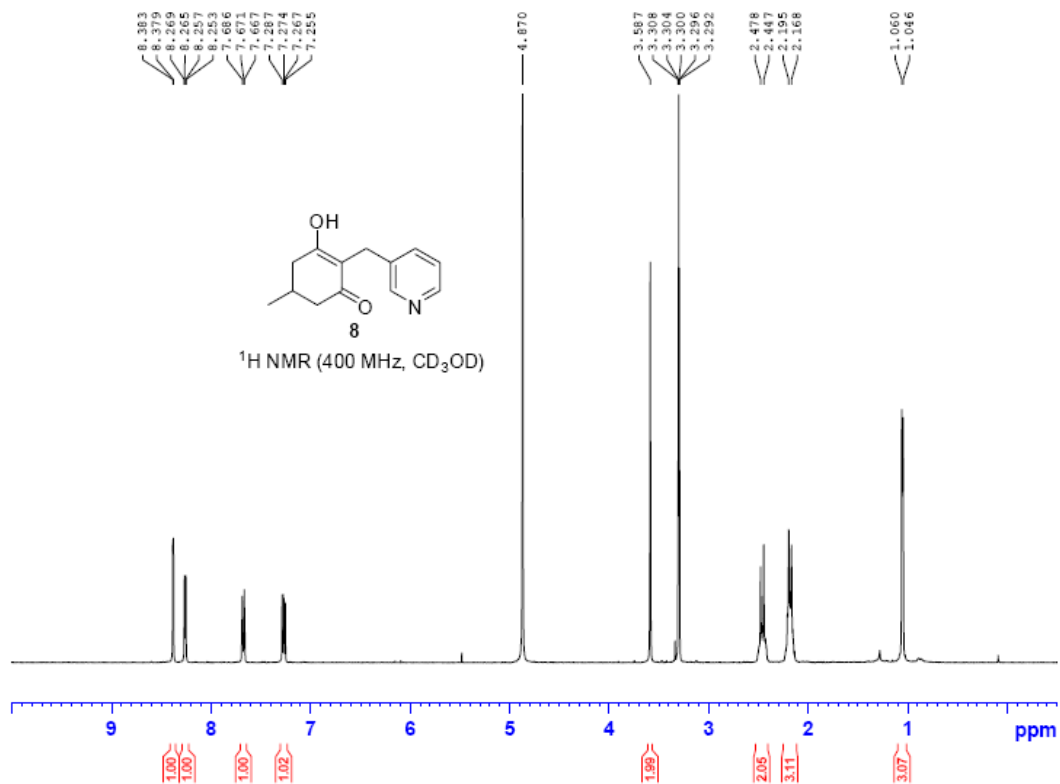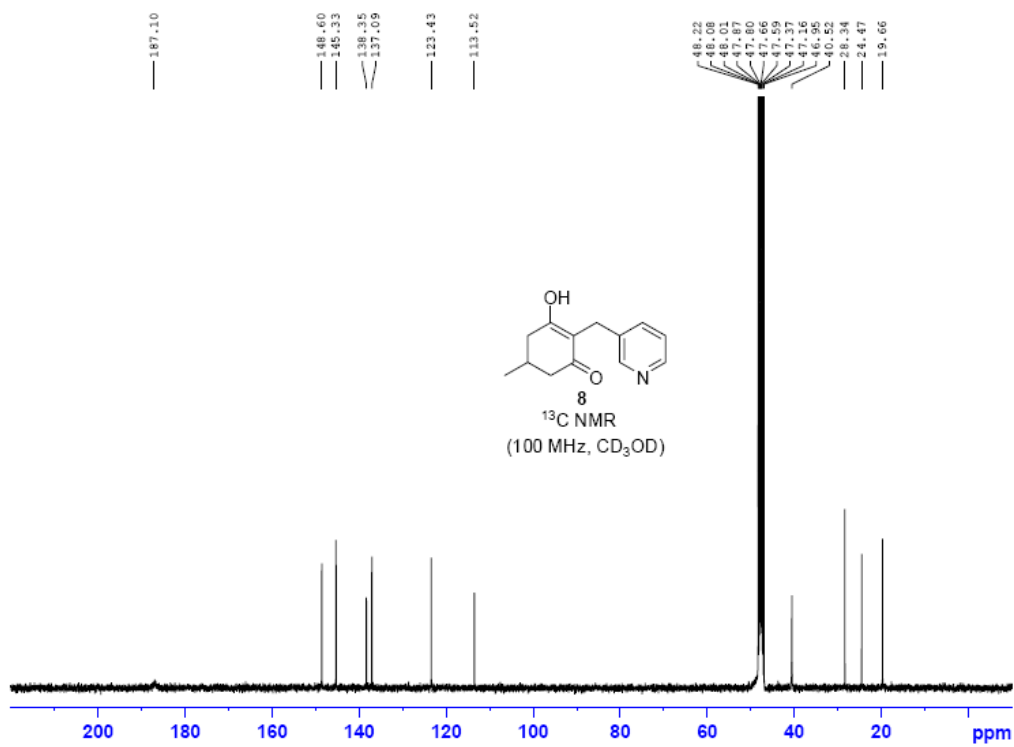

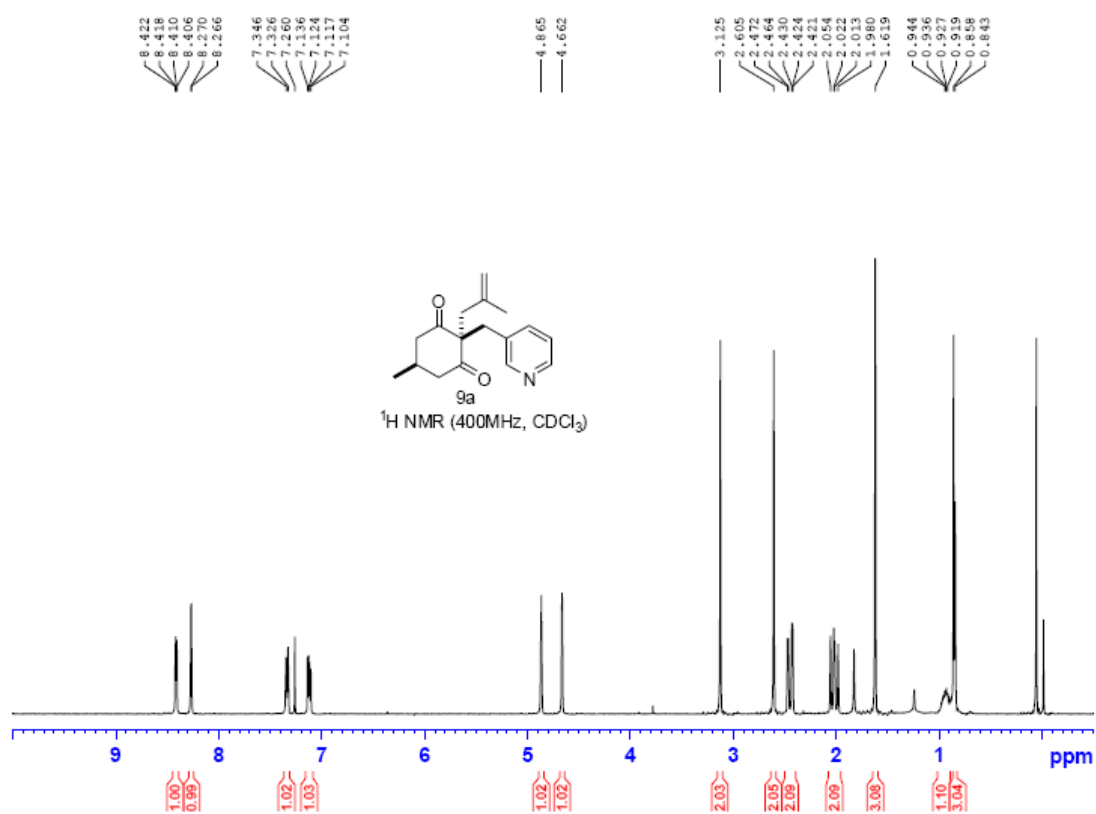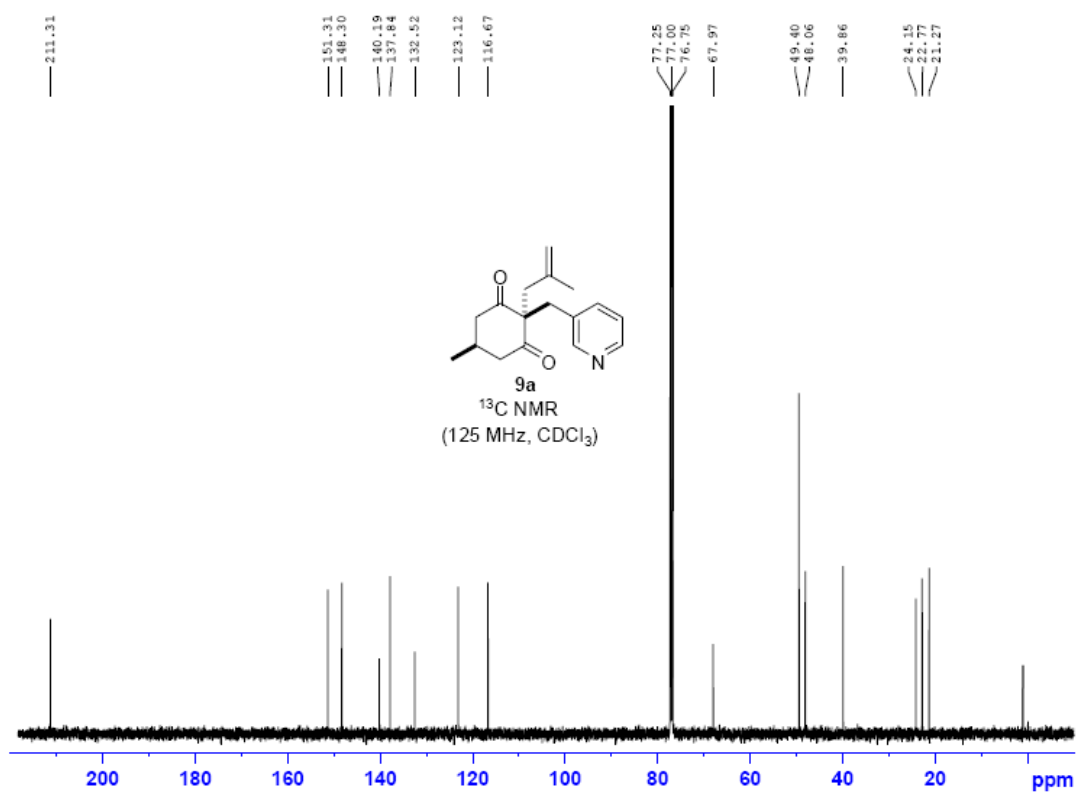

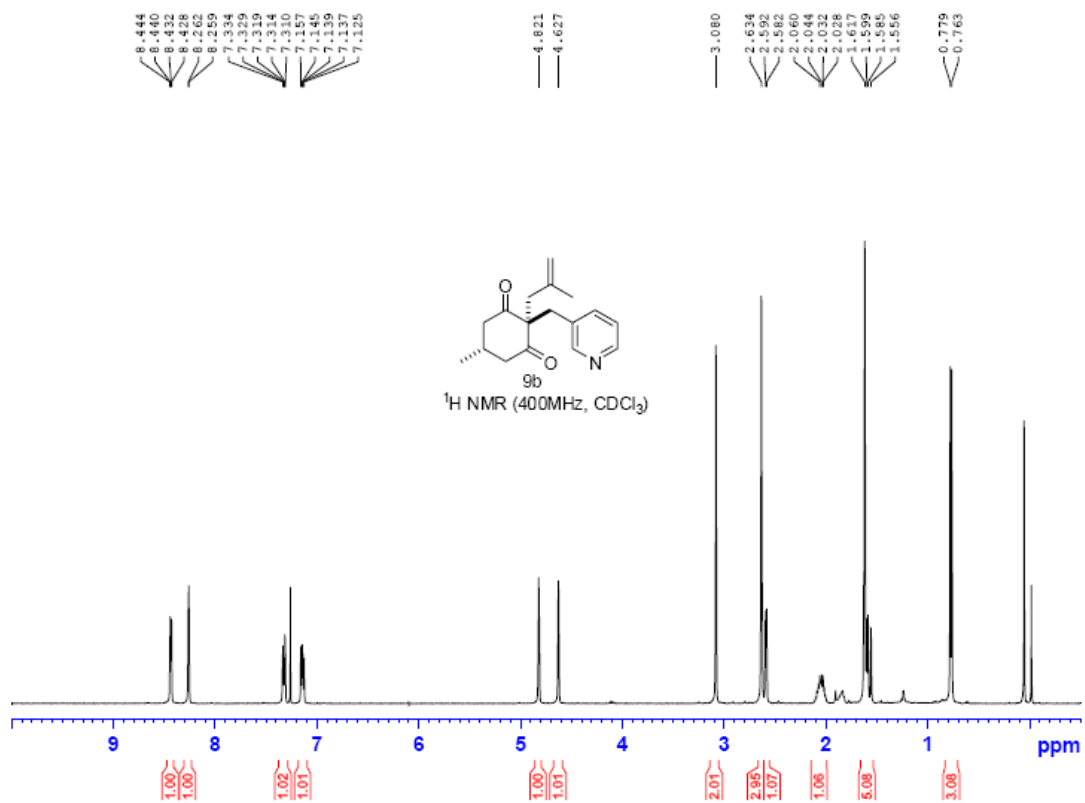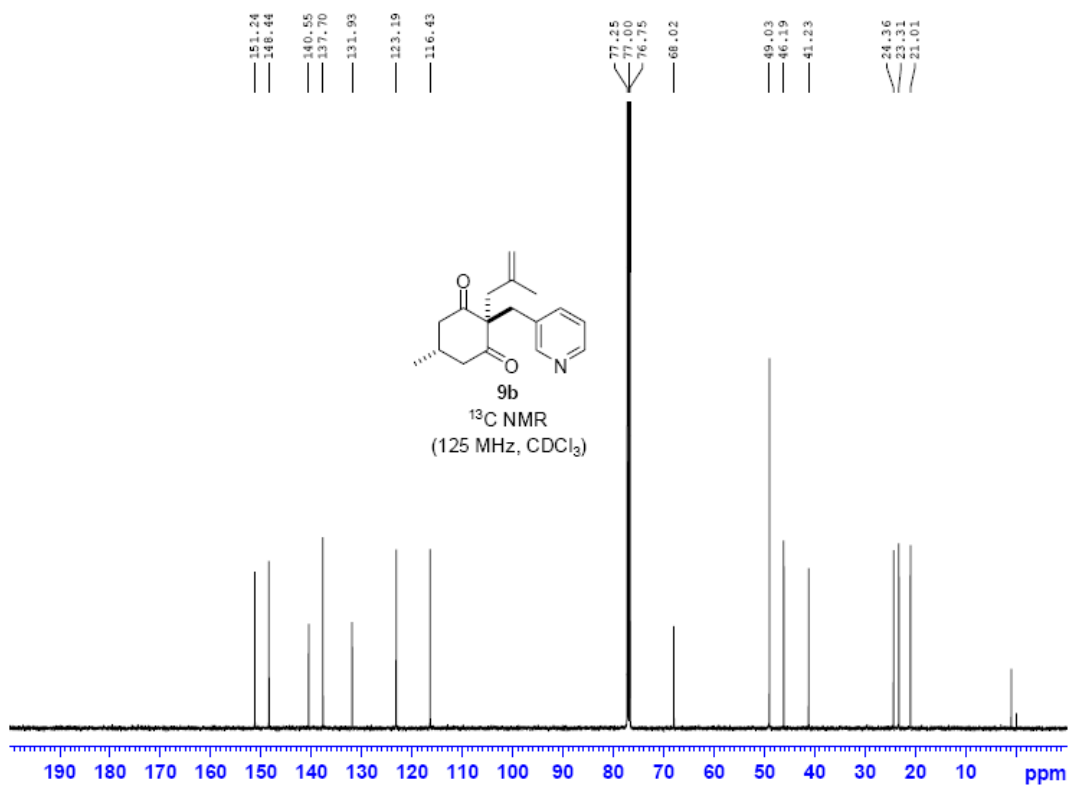

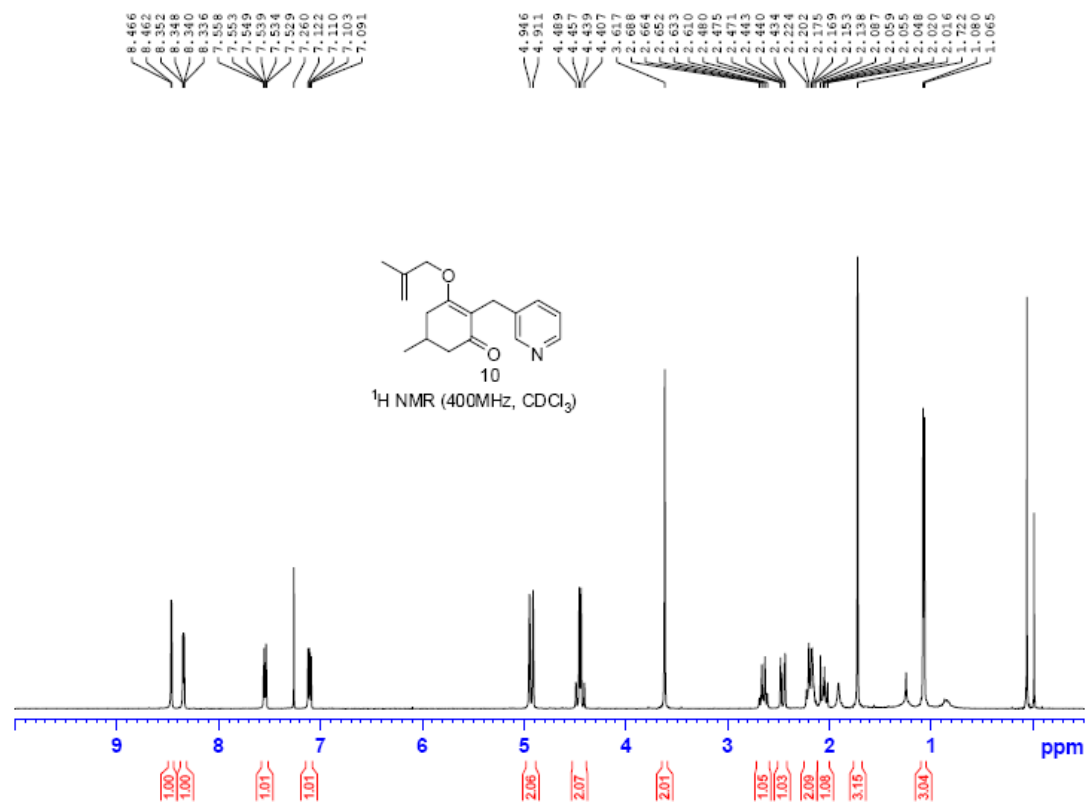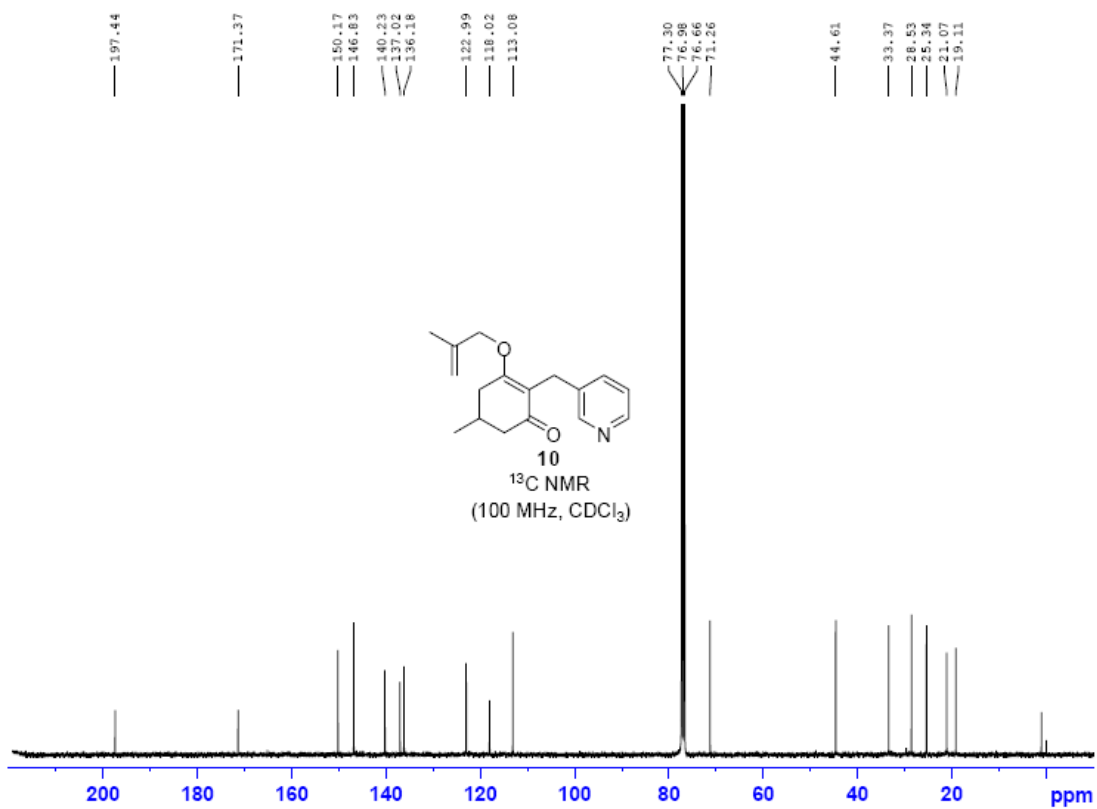

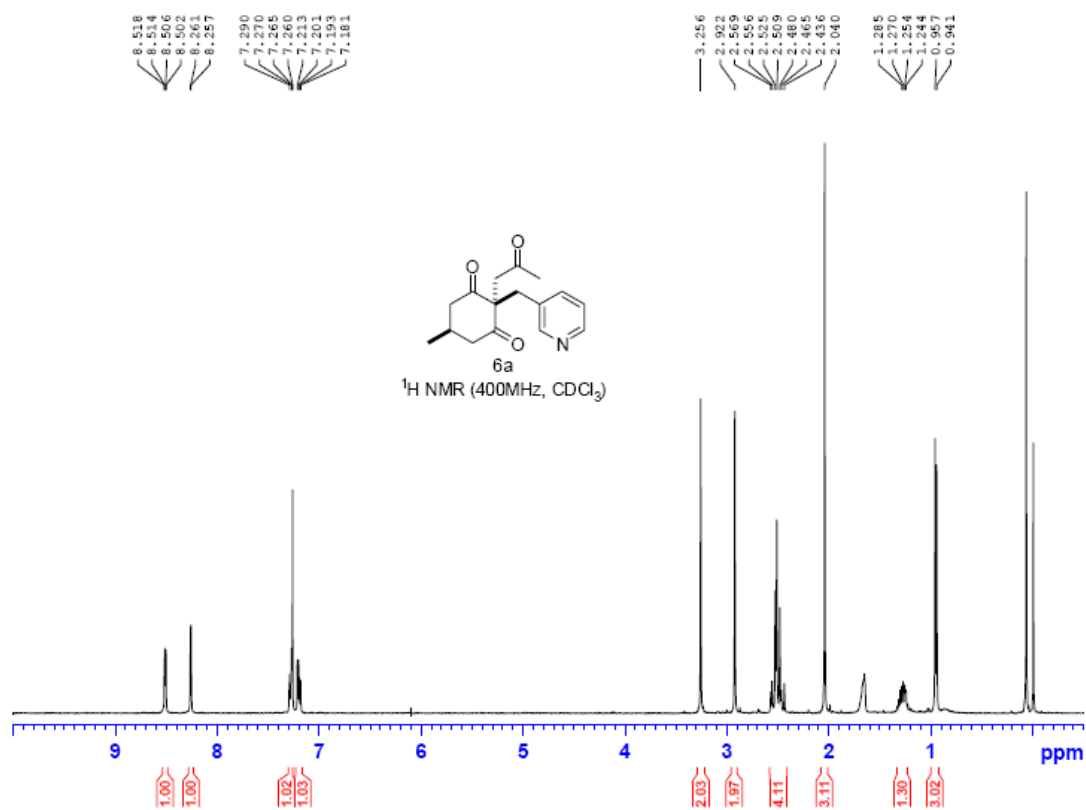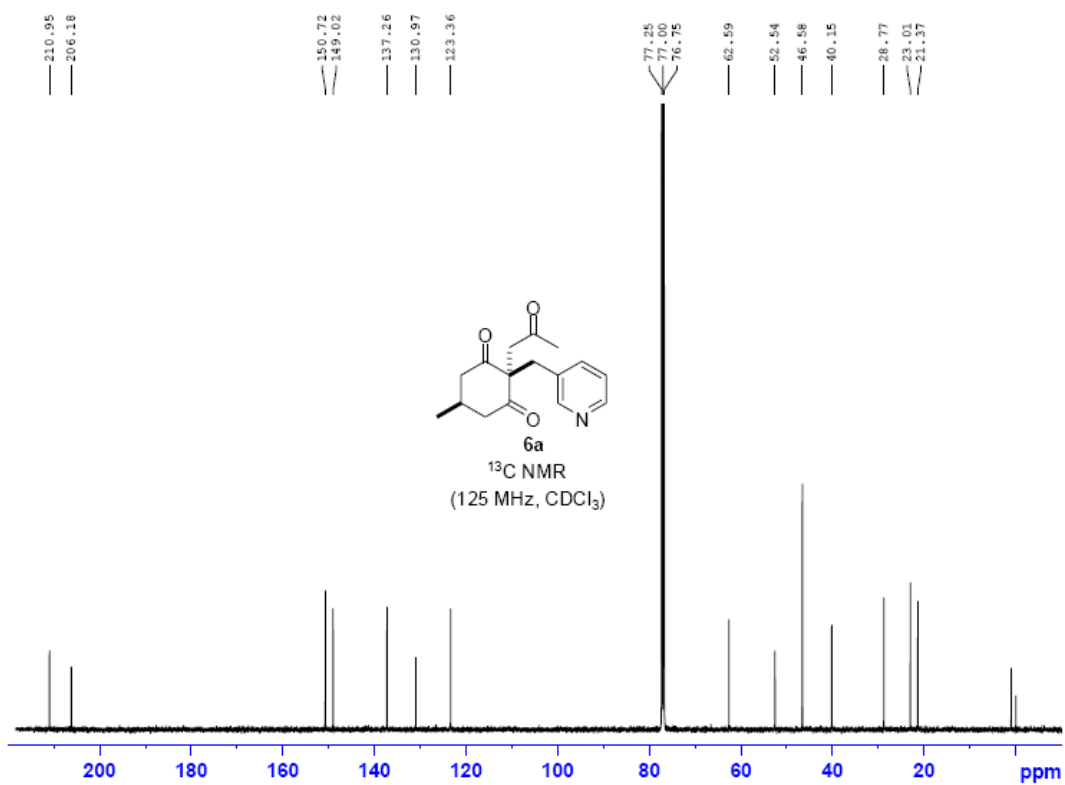

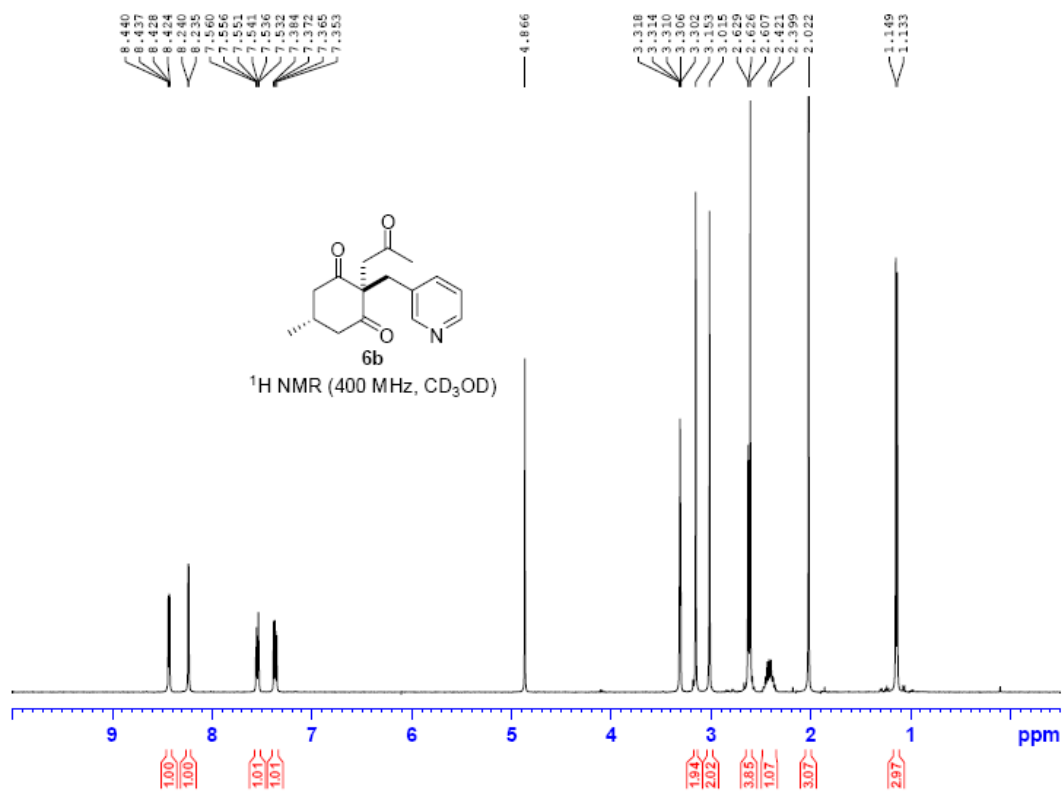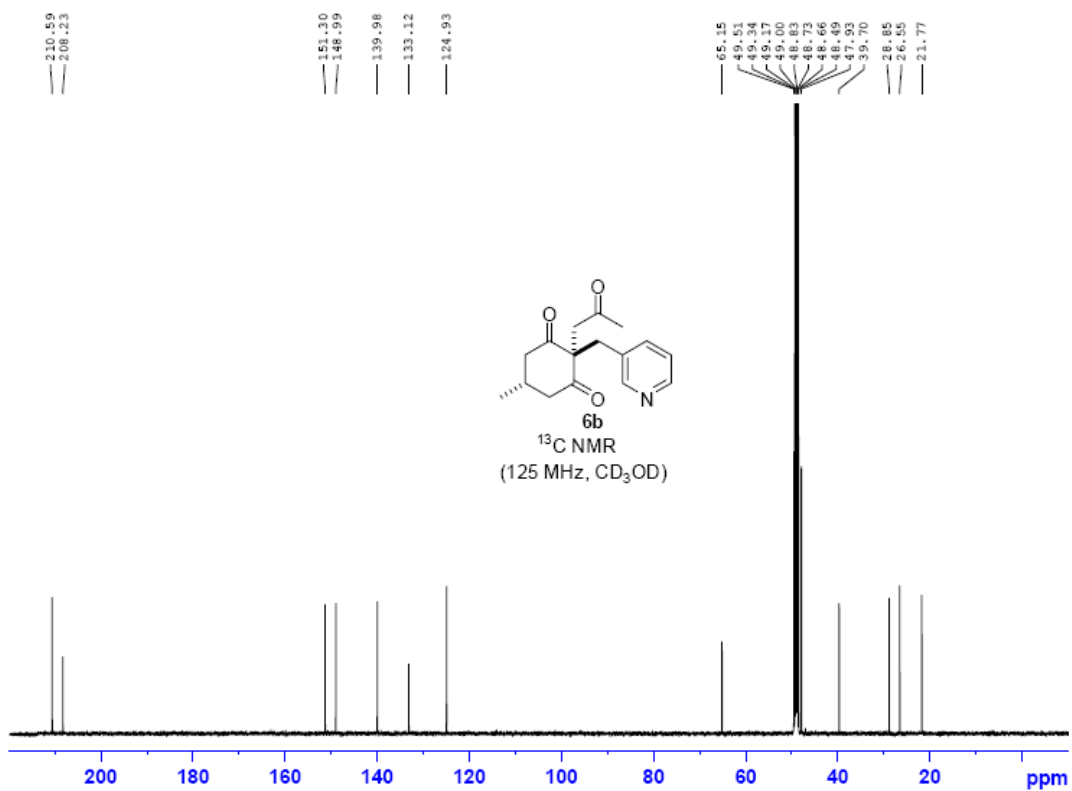



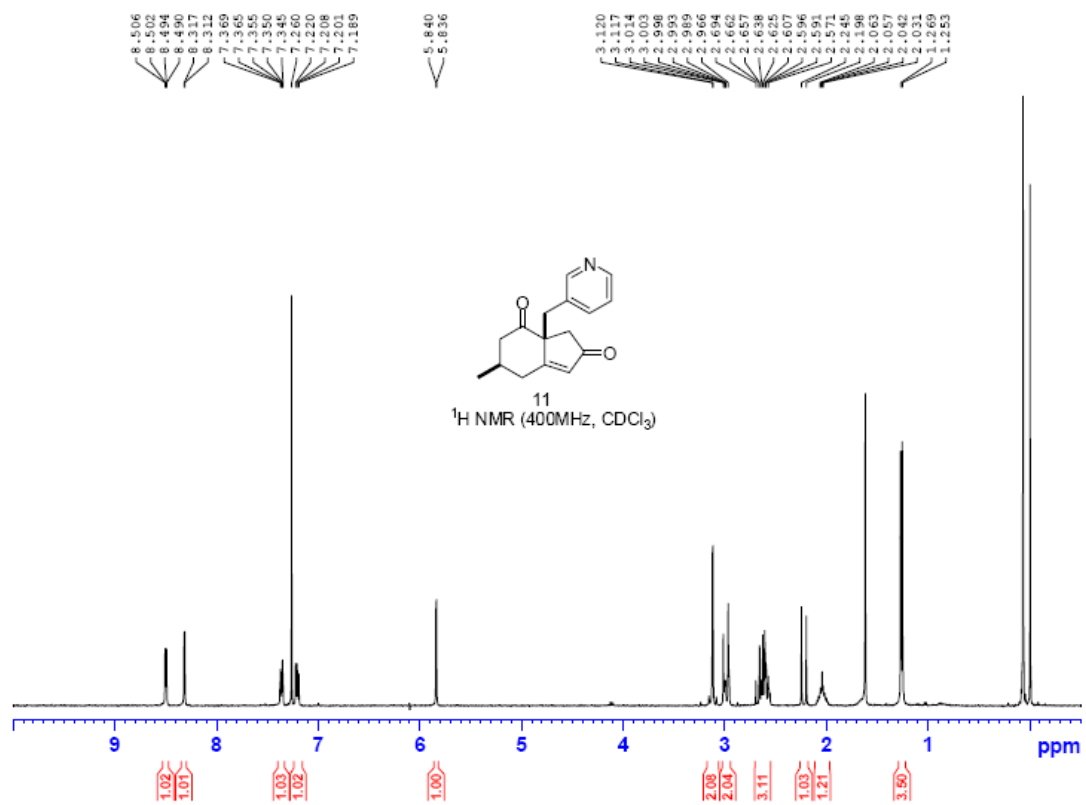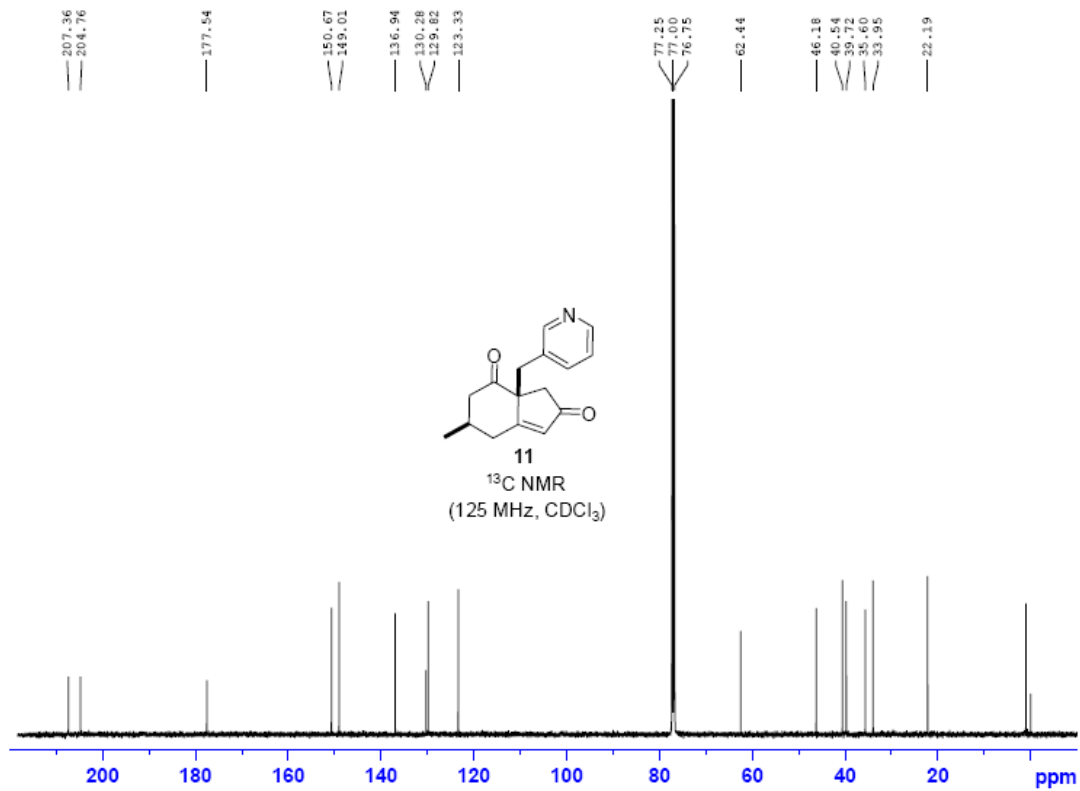

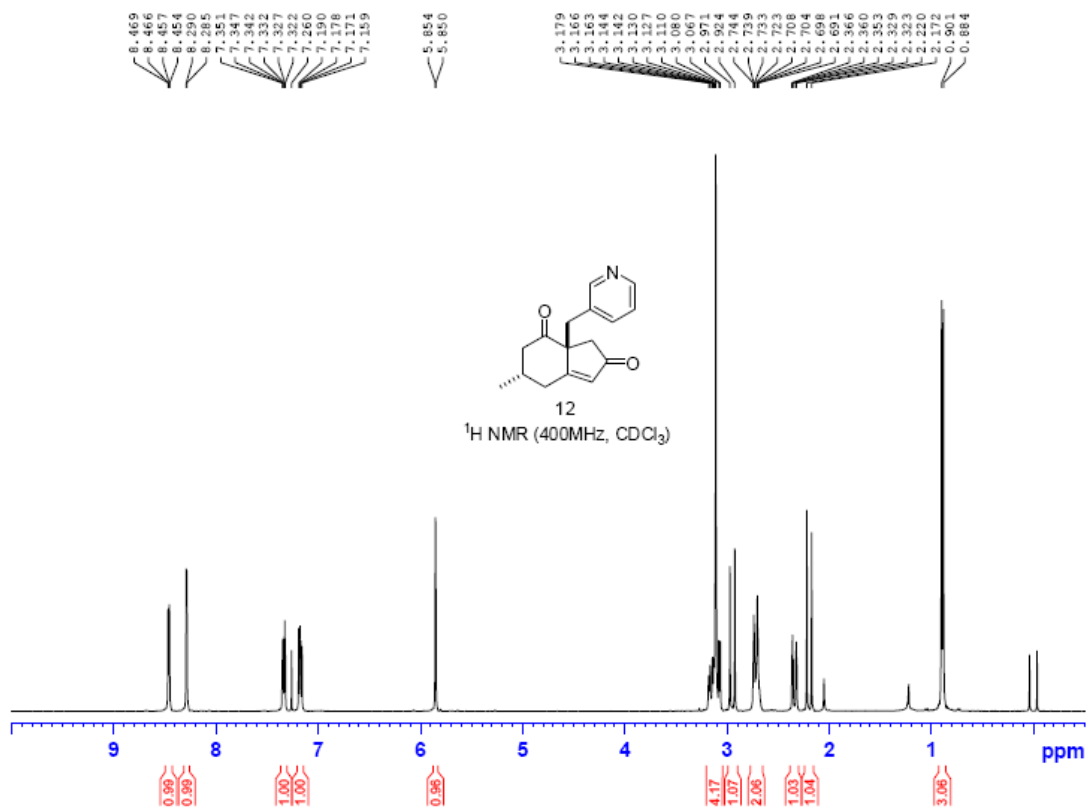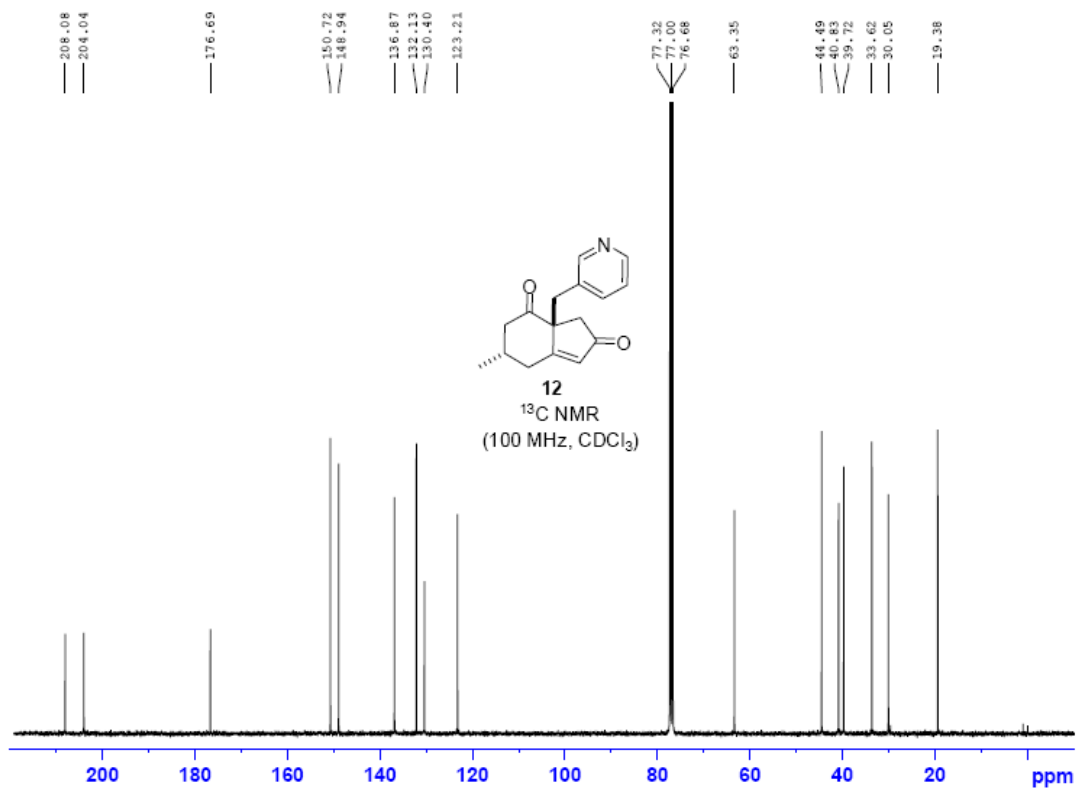

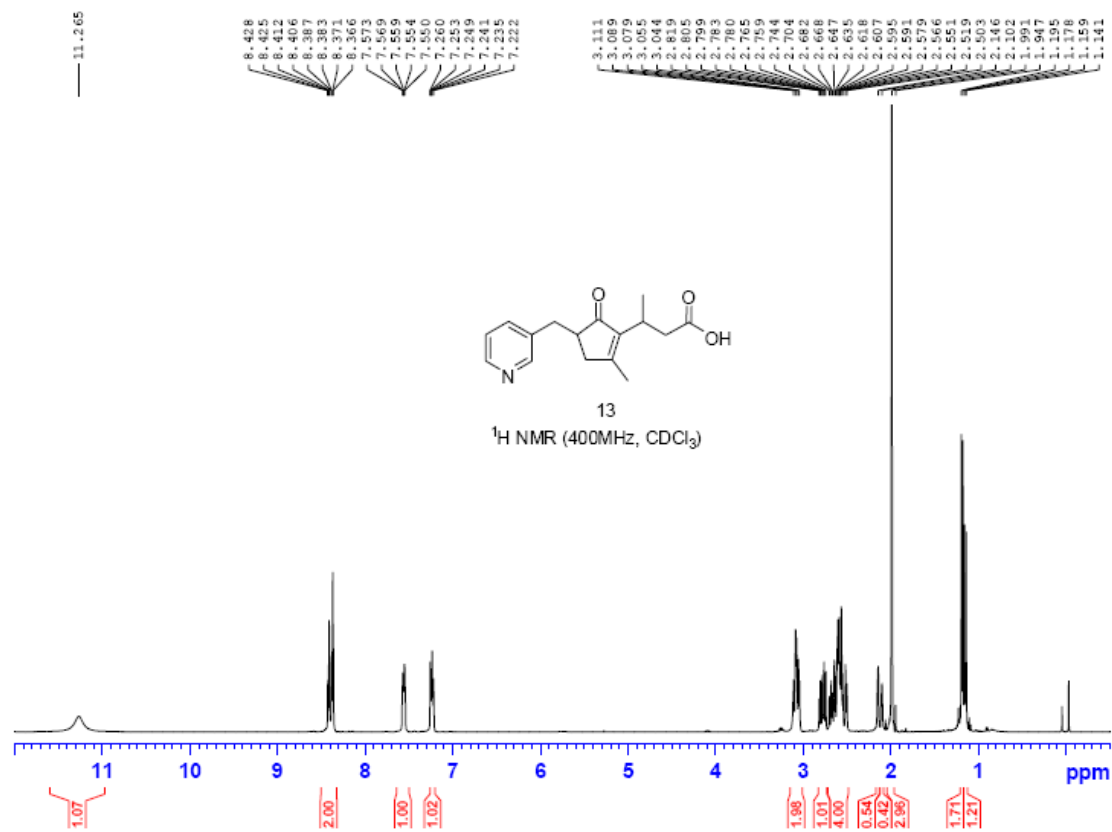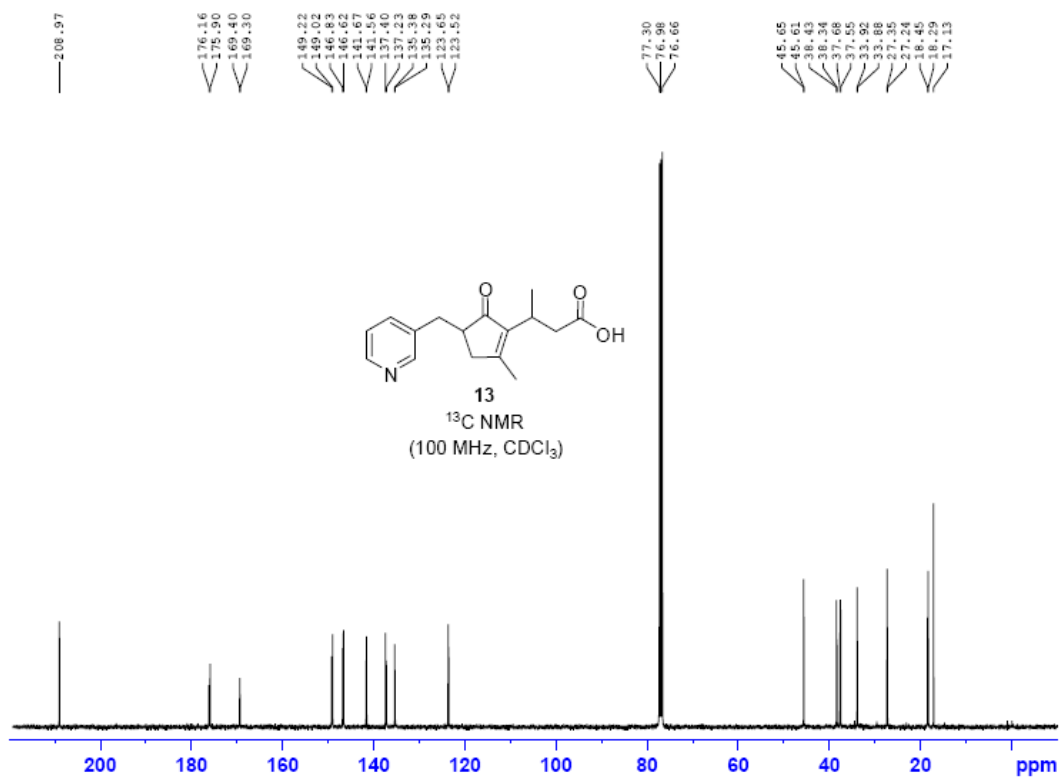

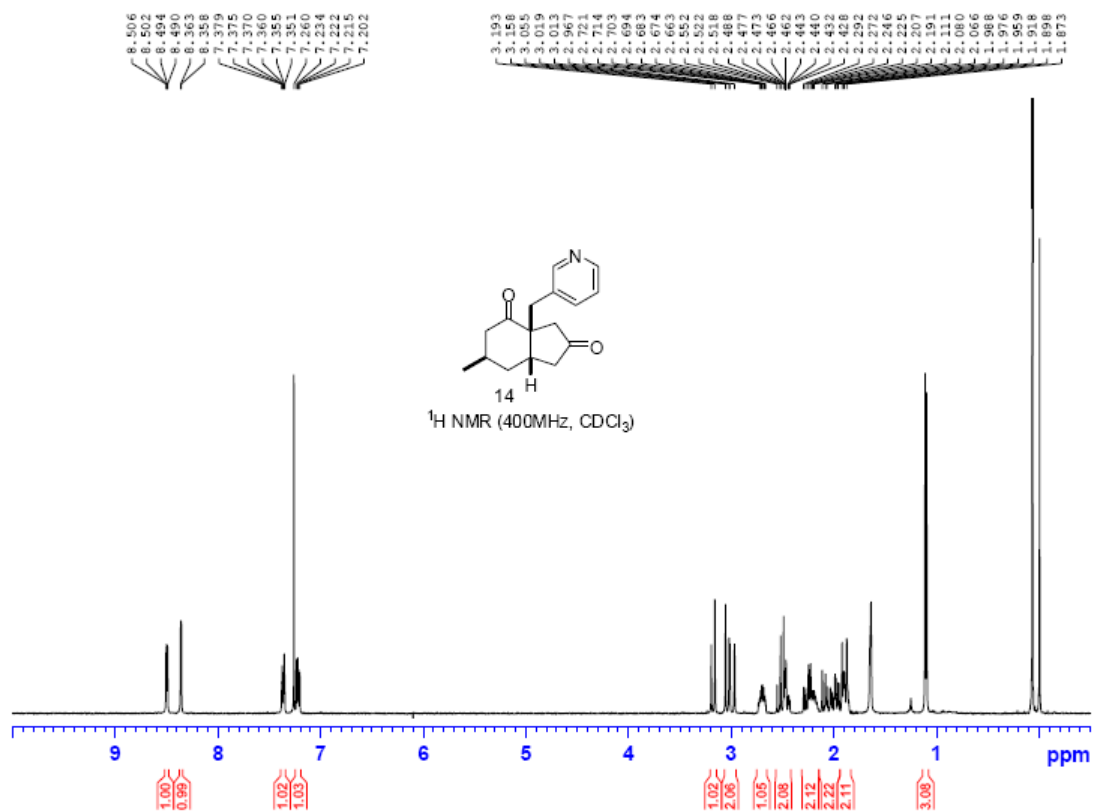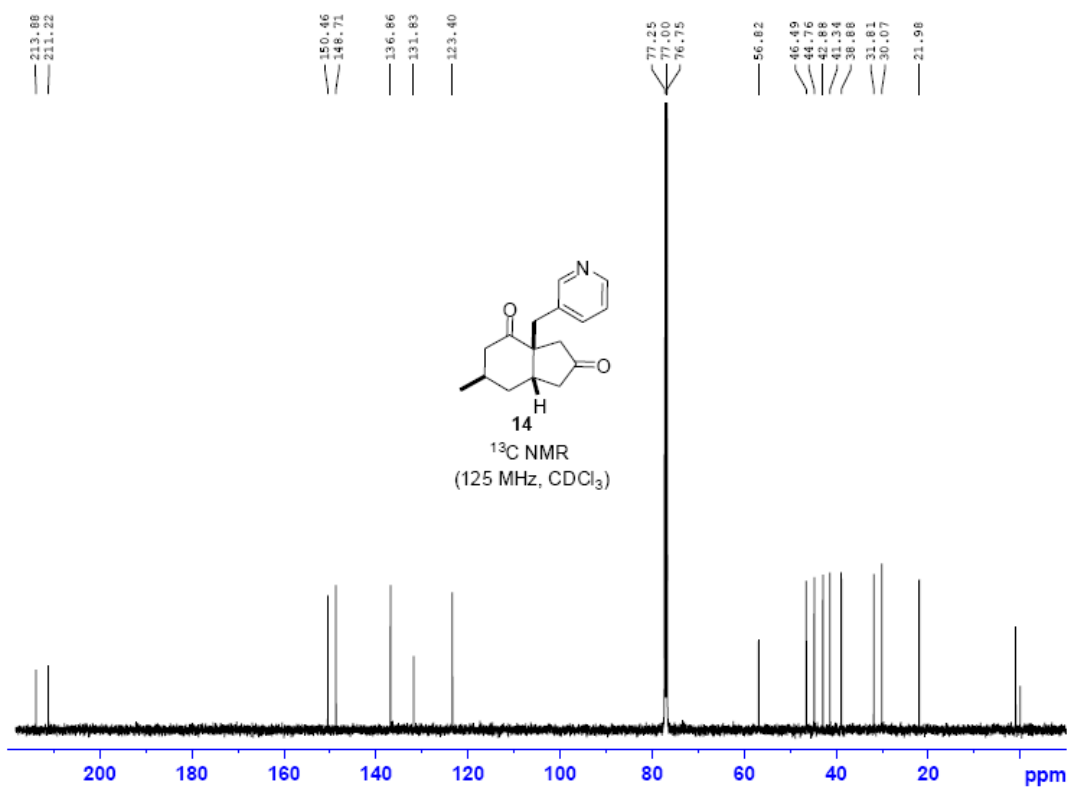

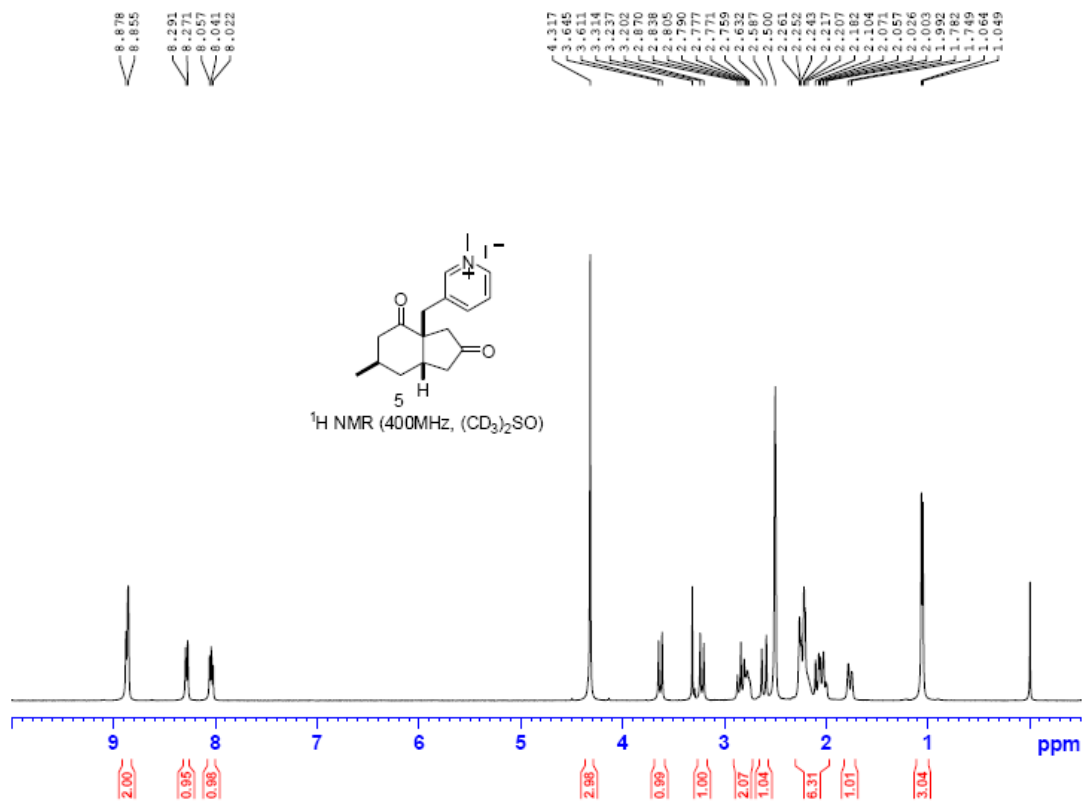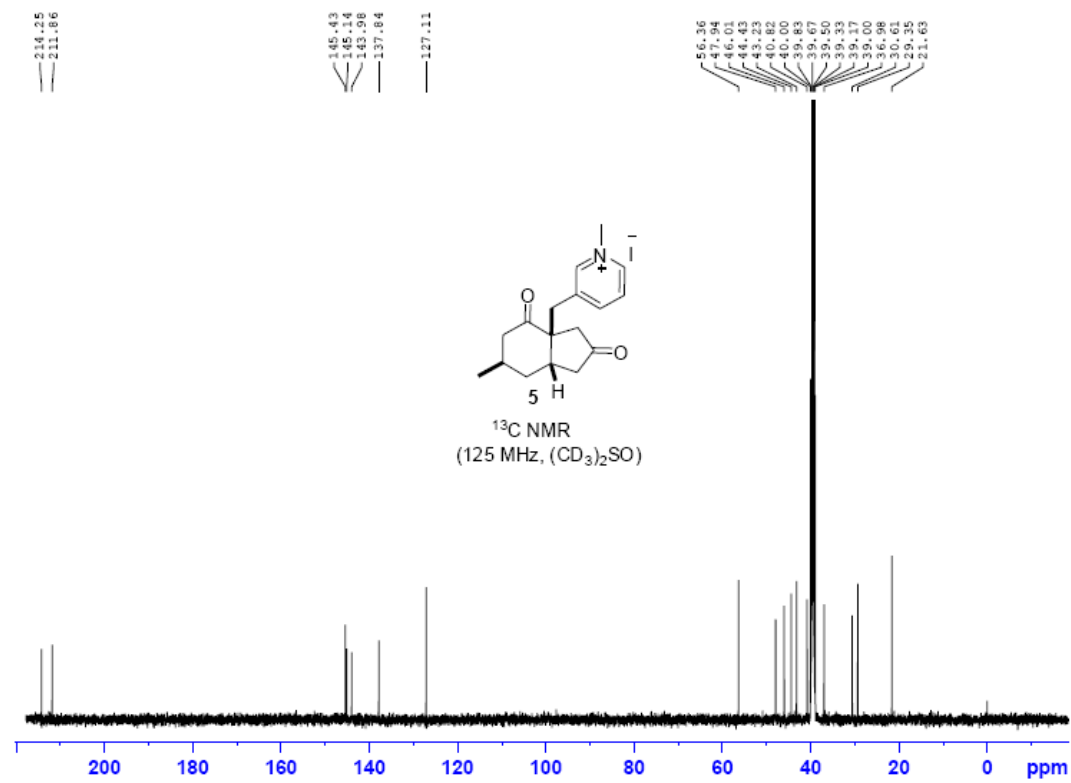

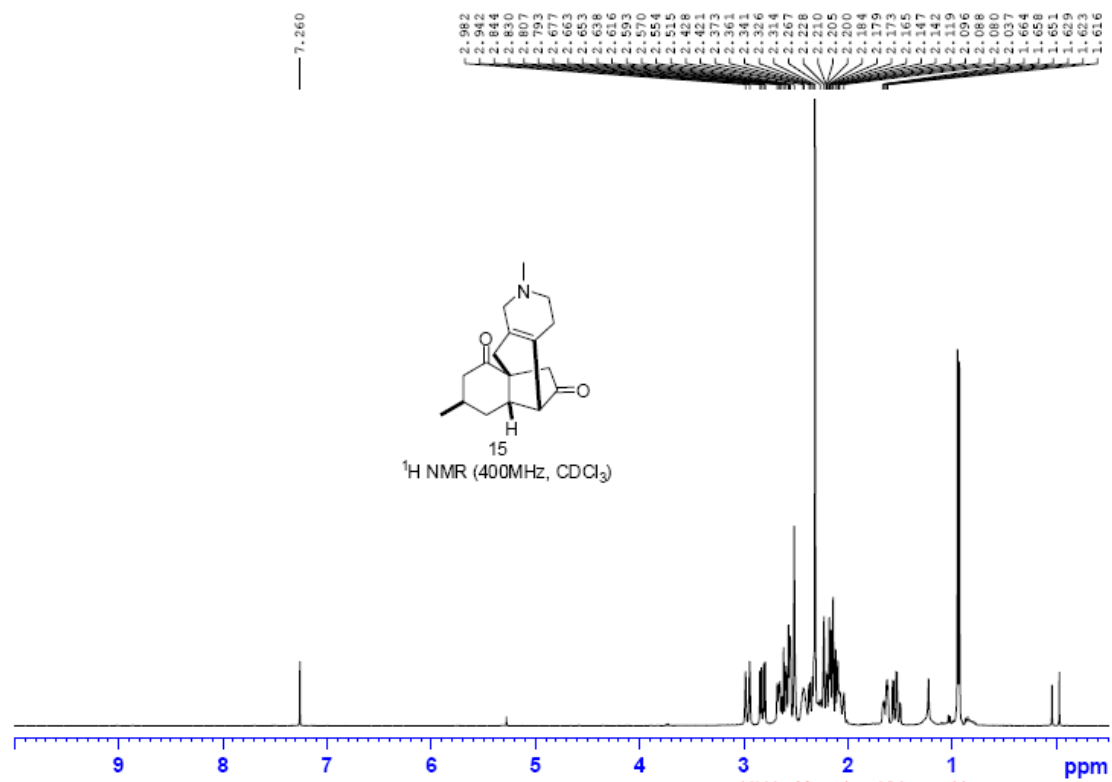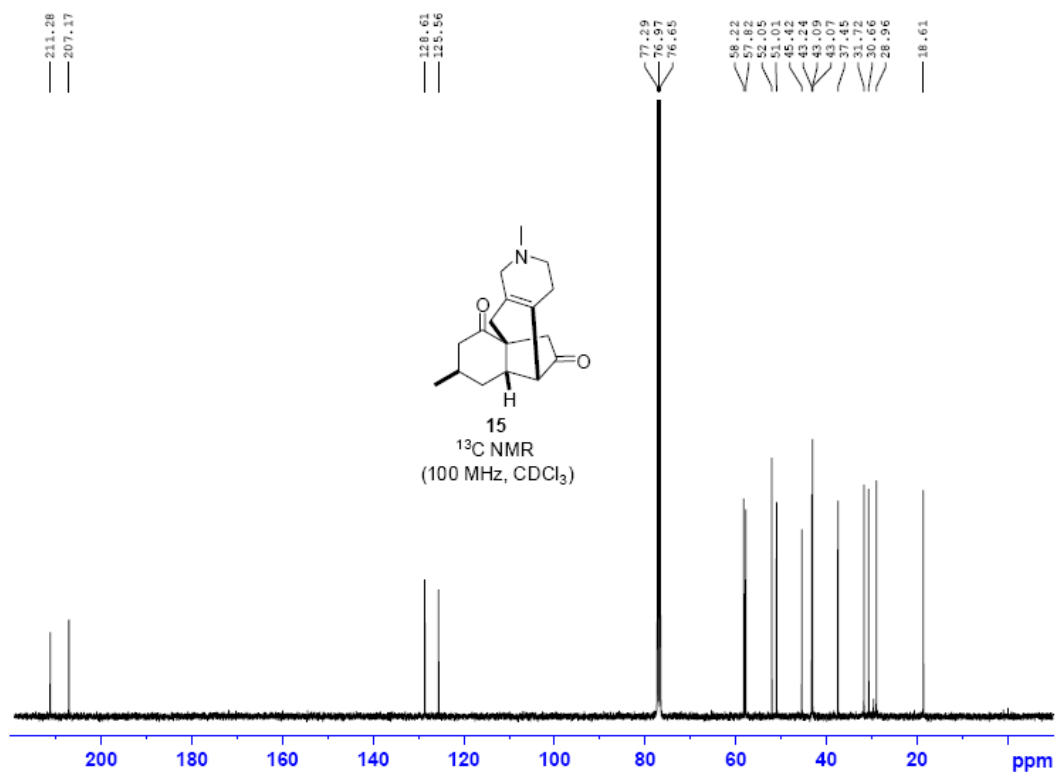

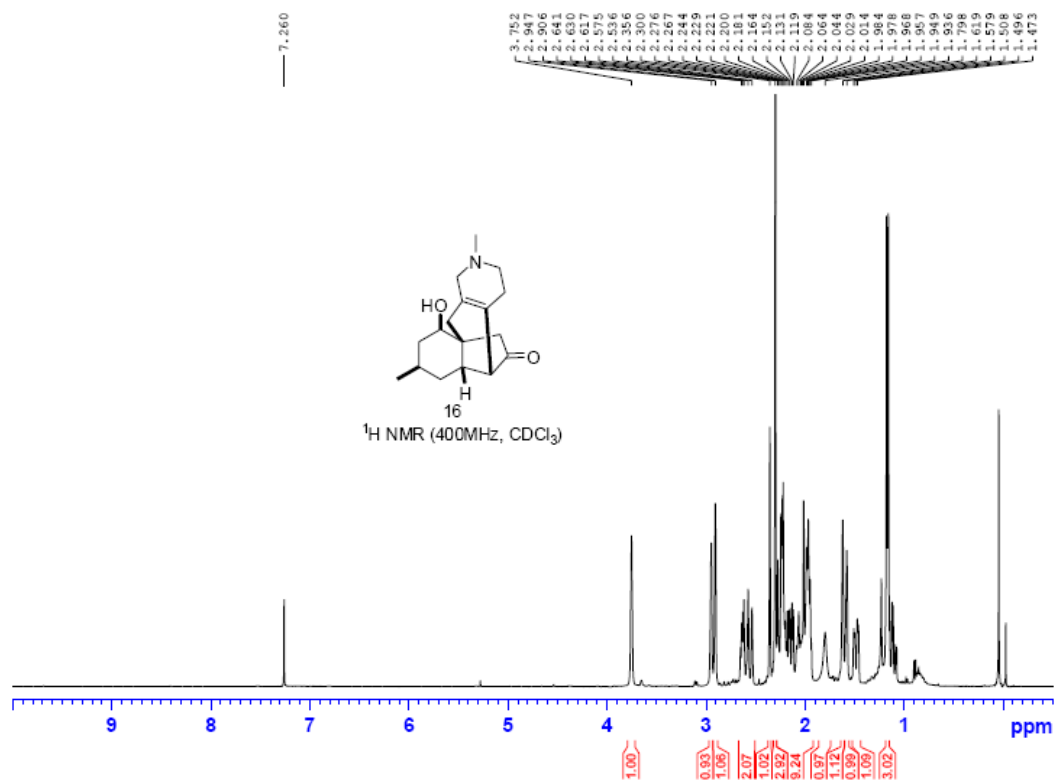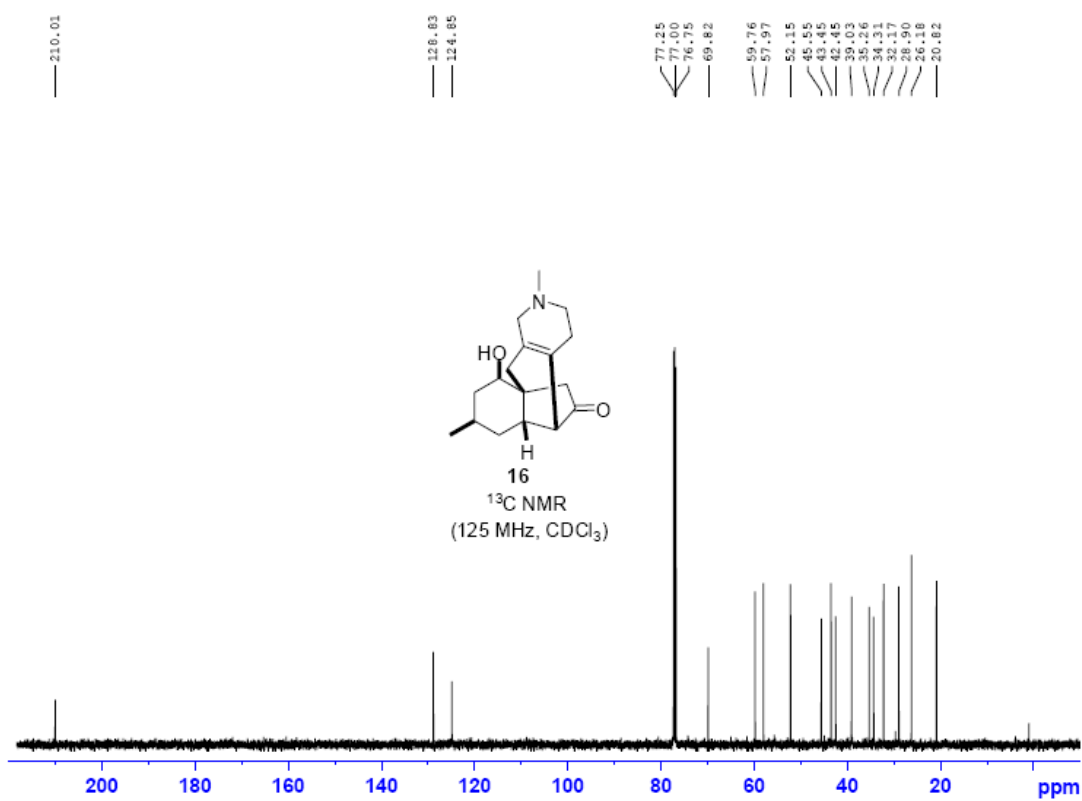

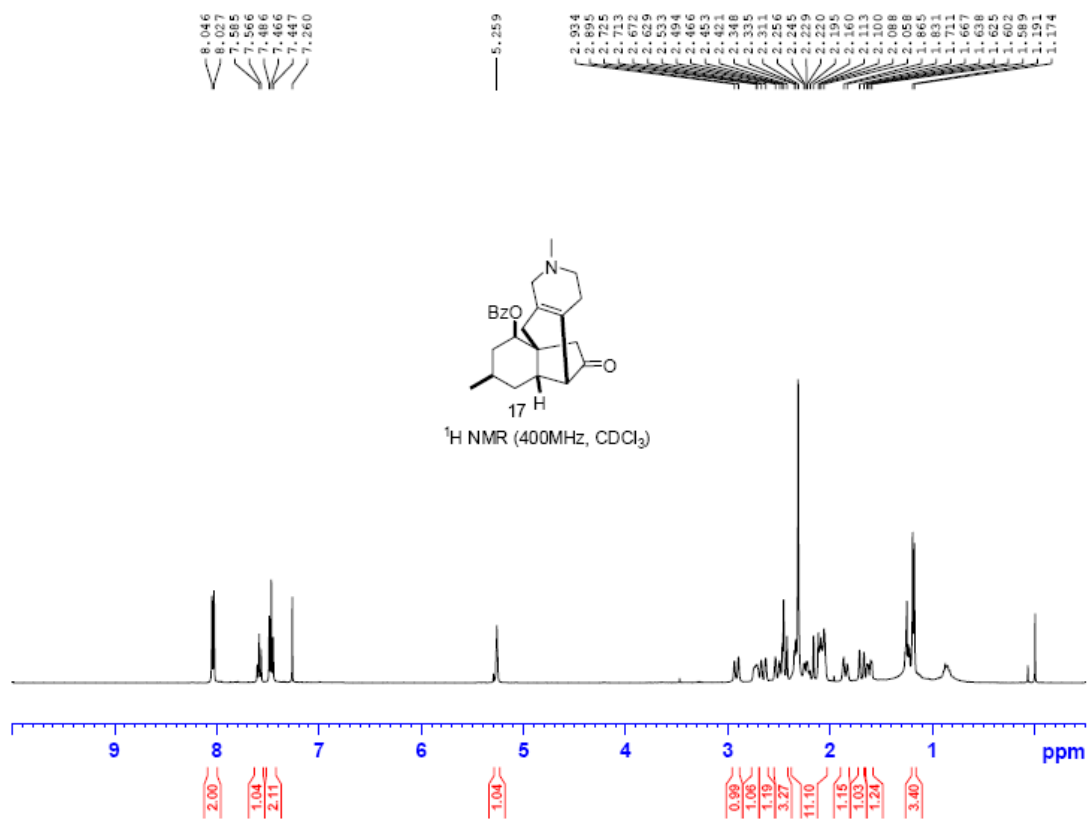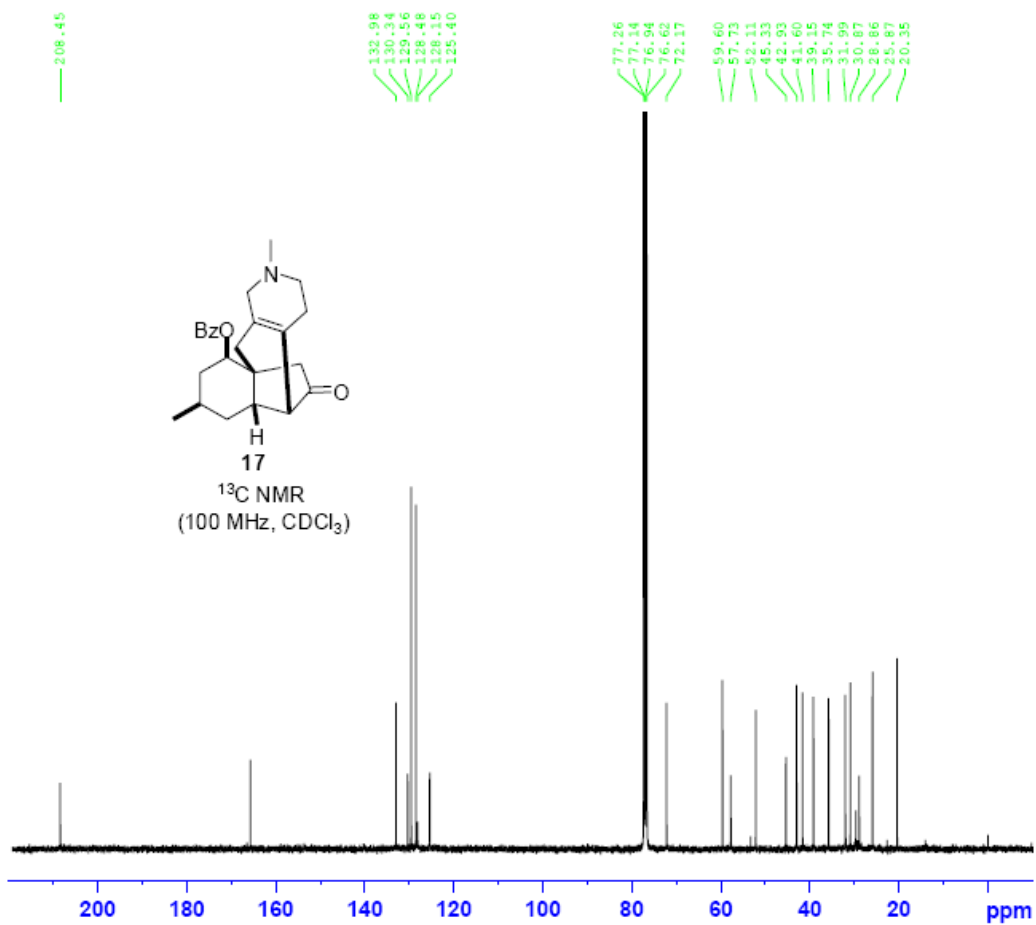



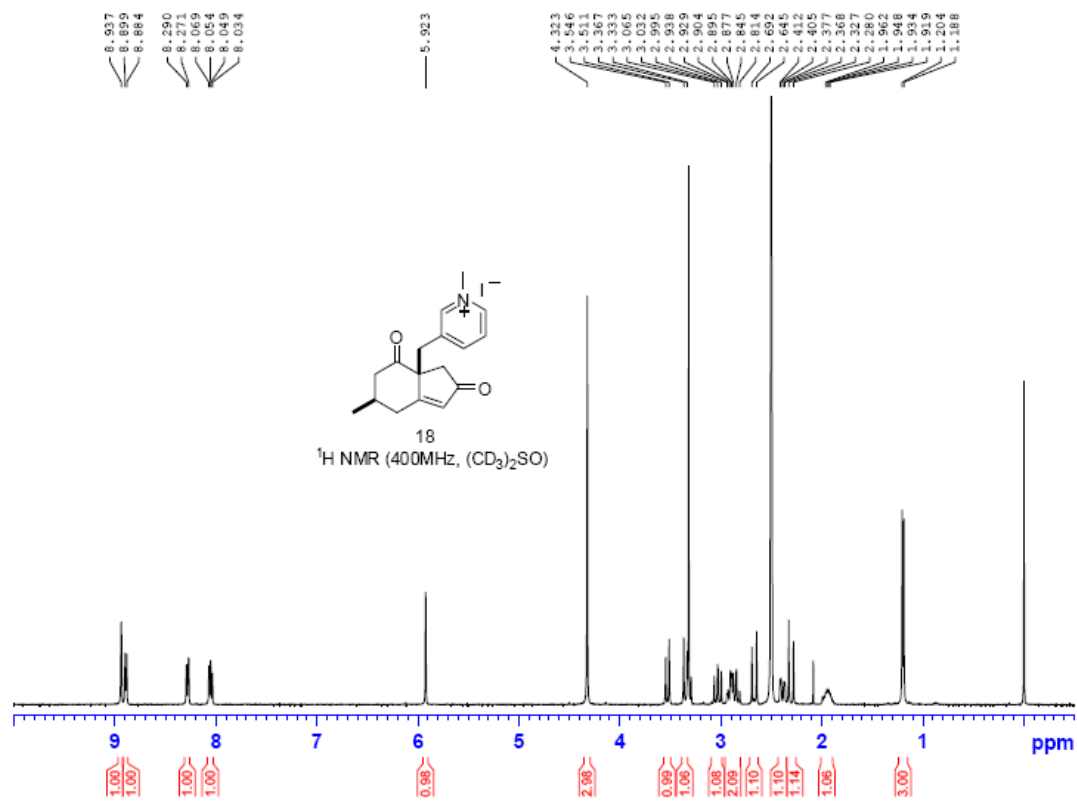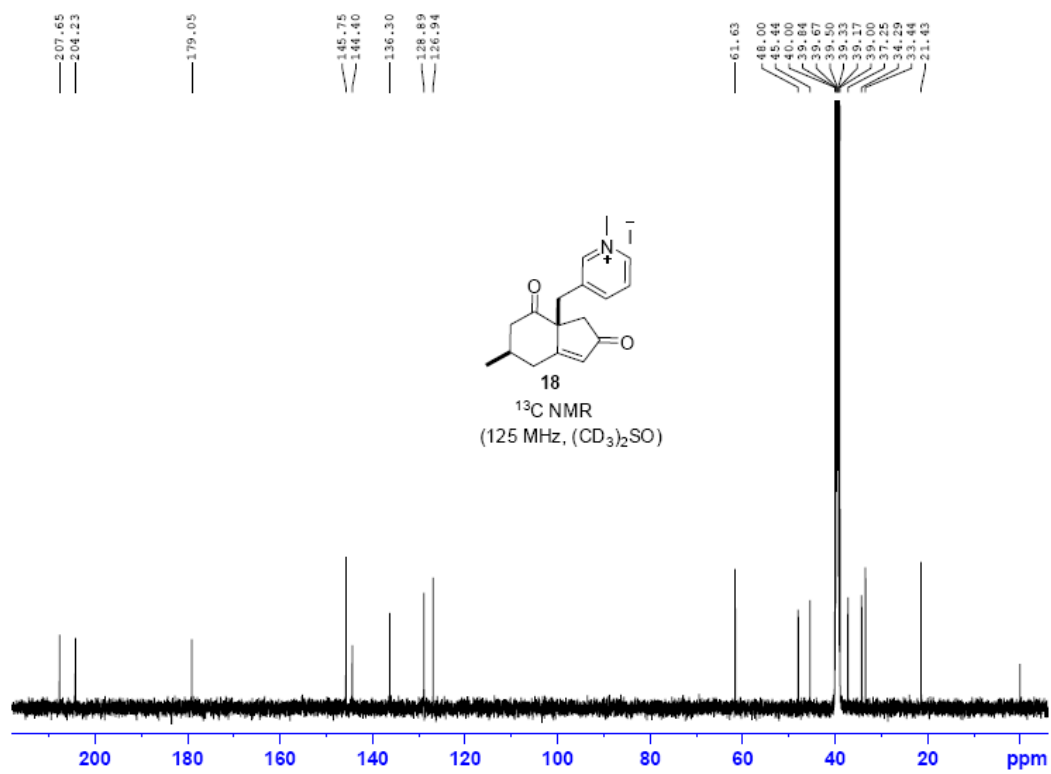

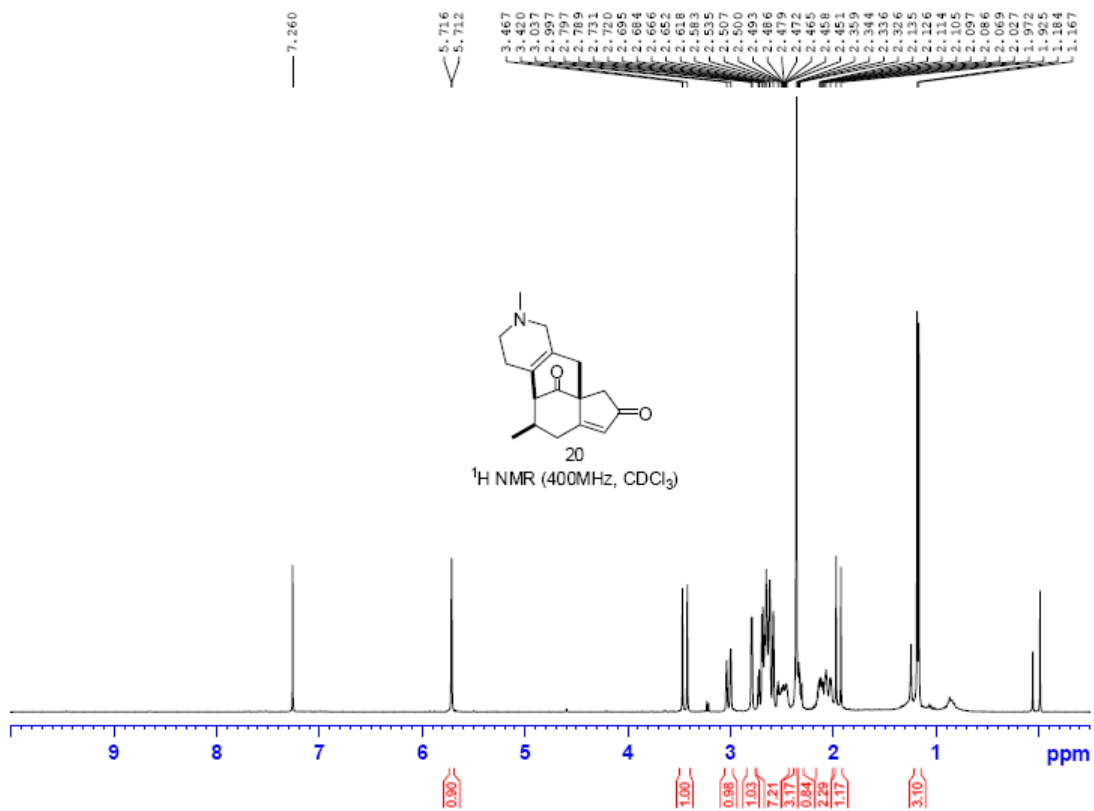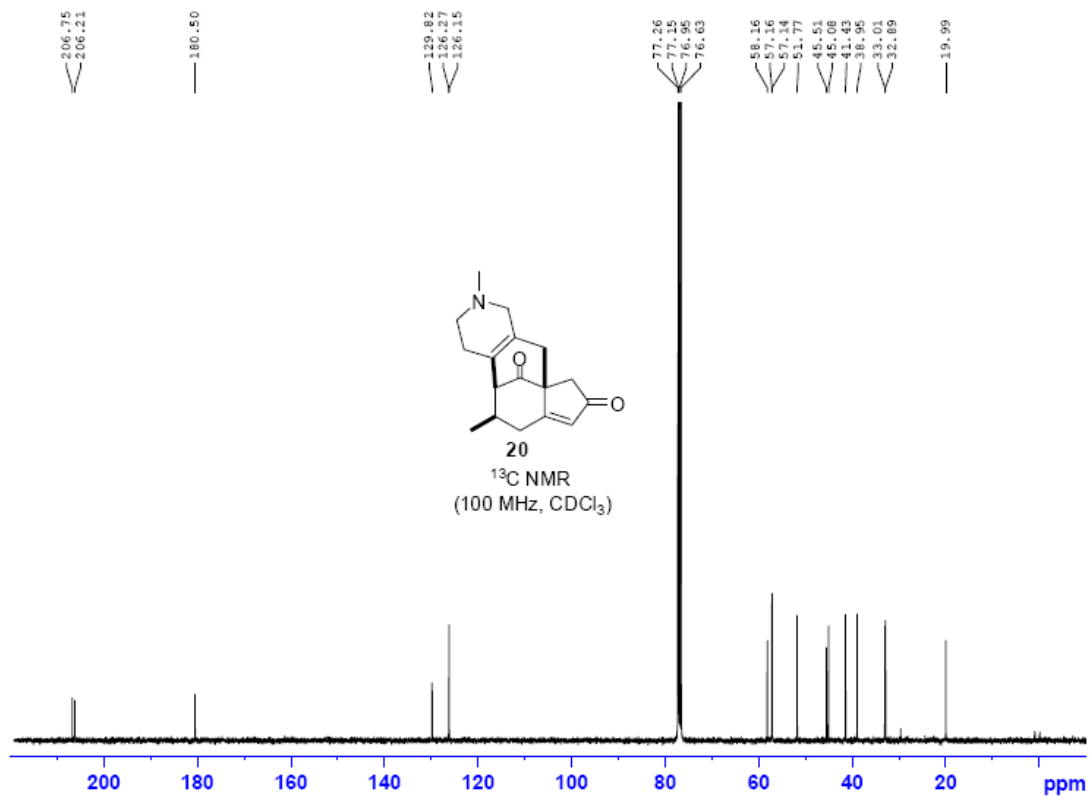

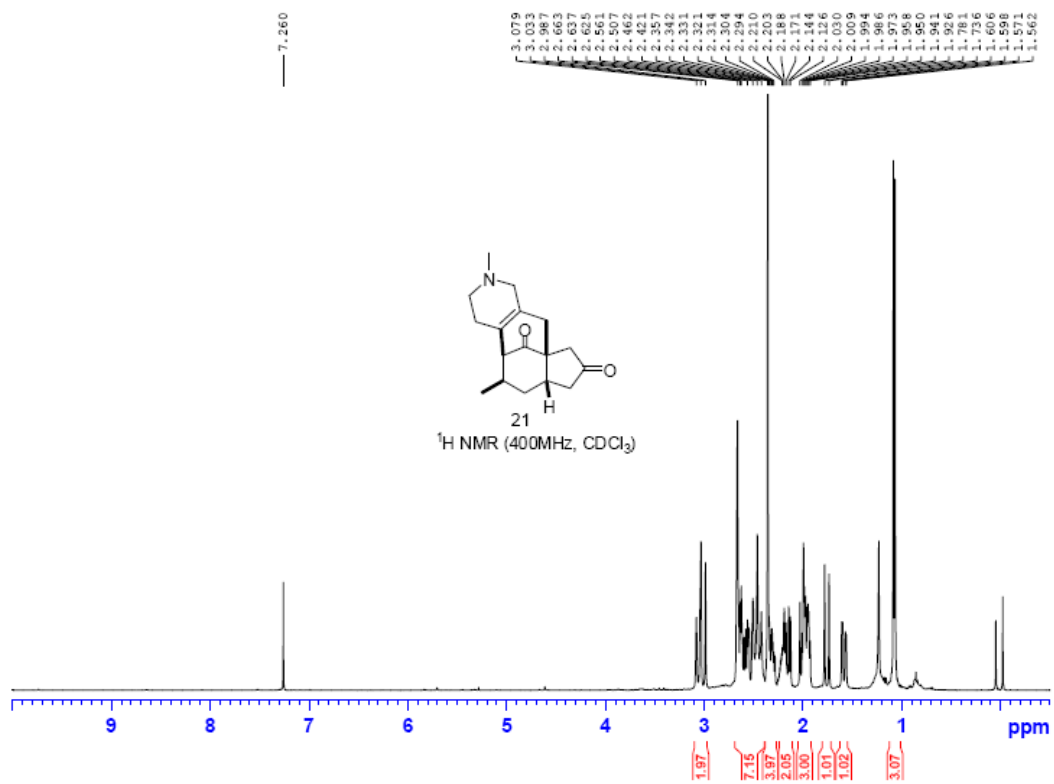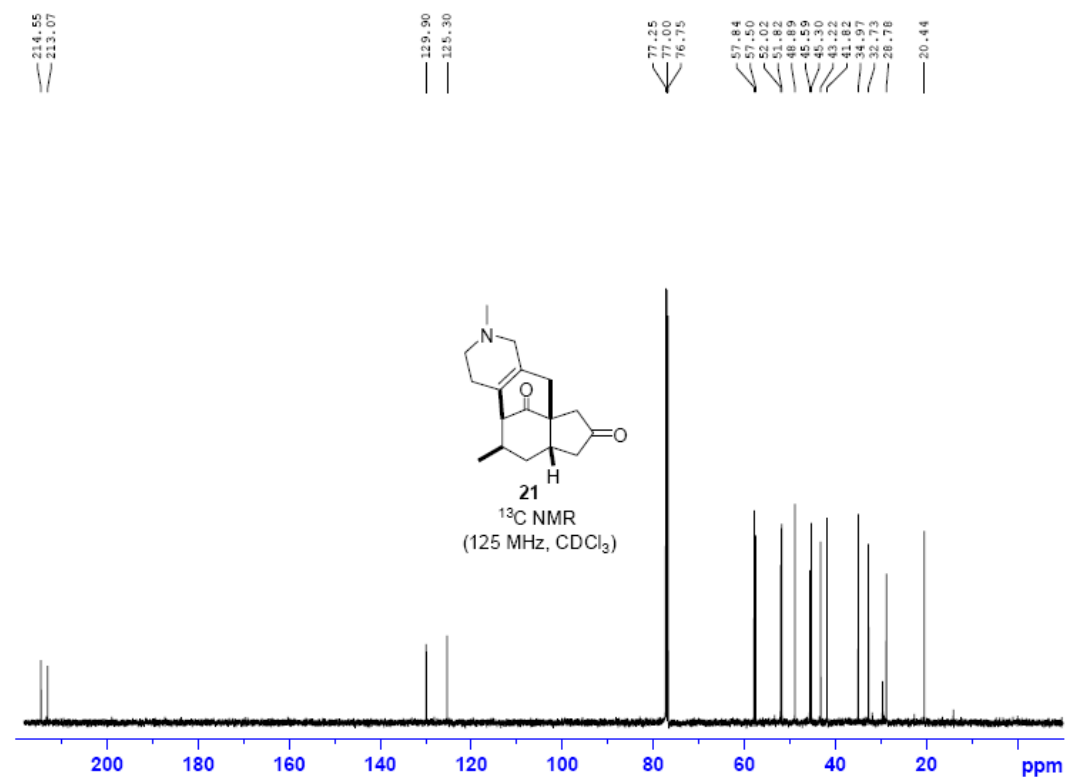

Supplement: c3ra41467a.pdf [file c3ra41467a.pdf]
